# Supplementary material for: SnoRNAs and miRNAs Networks Underlying COVID-19 Disease Severity
Source: MDPI journal article supplement (doi:10.3390/vaccines9101056), 2021-09-23
Supplement: s1 [file s1]

## Supplementary Materials for

SnoRNAs and miRNAs networks underlying COVID-19 disease severity

Aijaz Parray<sup>1†</sup>, Fayaz Ahmad Mir<sup>2†</sup>, Asmma Doudin<sup>3</sup>, Ahmad Iskandarani<sup>2</sup>, Ibn Mohammed Masud Danjuma<sup>4,5</sup>, Rahim Ayadathil Thazhhe Kuni<sup>1</sup>, Alaaedin Abdelmajid<sup>6</sup>, Ibrahim Abdelhafez<sup>4</sup>, Rida Arif<sup>4</sup>, Mohammad Mulhim<sup>6</sup>, Mohammad Abukhattab<sup>6</sup>, Shoukat Rashhid Dar<sup>8</sup>, Eyad Elkord<sup>7</sup>, Abdul Latif Al-khal<sup>6</sup>, Abdel-Naser Elzouki<sup>4,5</sup>, Farhan Cyprian<sup>4,9\*</sup>.

Correspondence to: Farhan.cyprian@gmail.com

### **This file includes:**

Figures S1–S2

Tables S1–S5

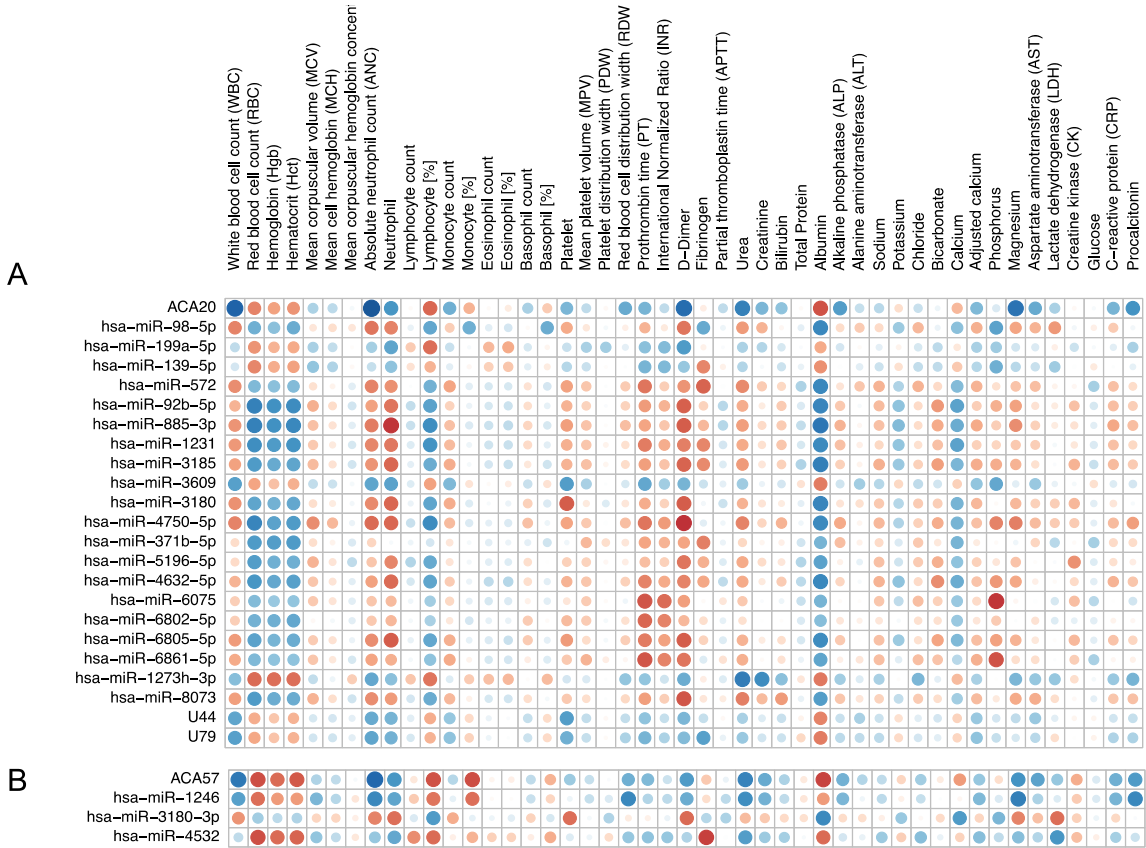

**Figure S1.** Spearman correlation matrix of clinical markers with uniquely DEMIs and snoRNAs in (A) severe versus mild and (B) severe versus asymptomatic comparisons. Each cell contains a correlation coefficient between the possible pairs of variables, namely Spearman's rho statistic calculated at a significance level of 0.05. Color scale ranges from blue ( $r = -1$ ) to white ( $r = 0$ ) to red ( $r = 1$ ).

(A)

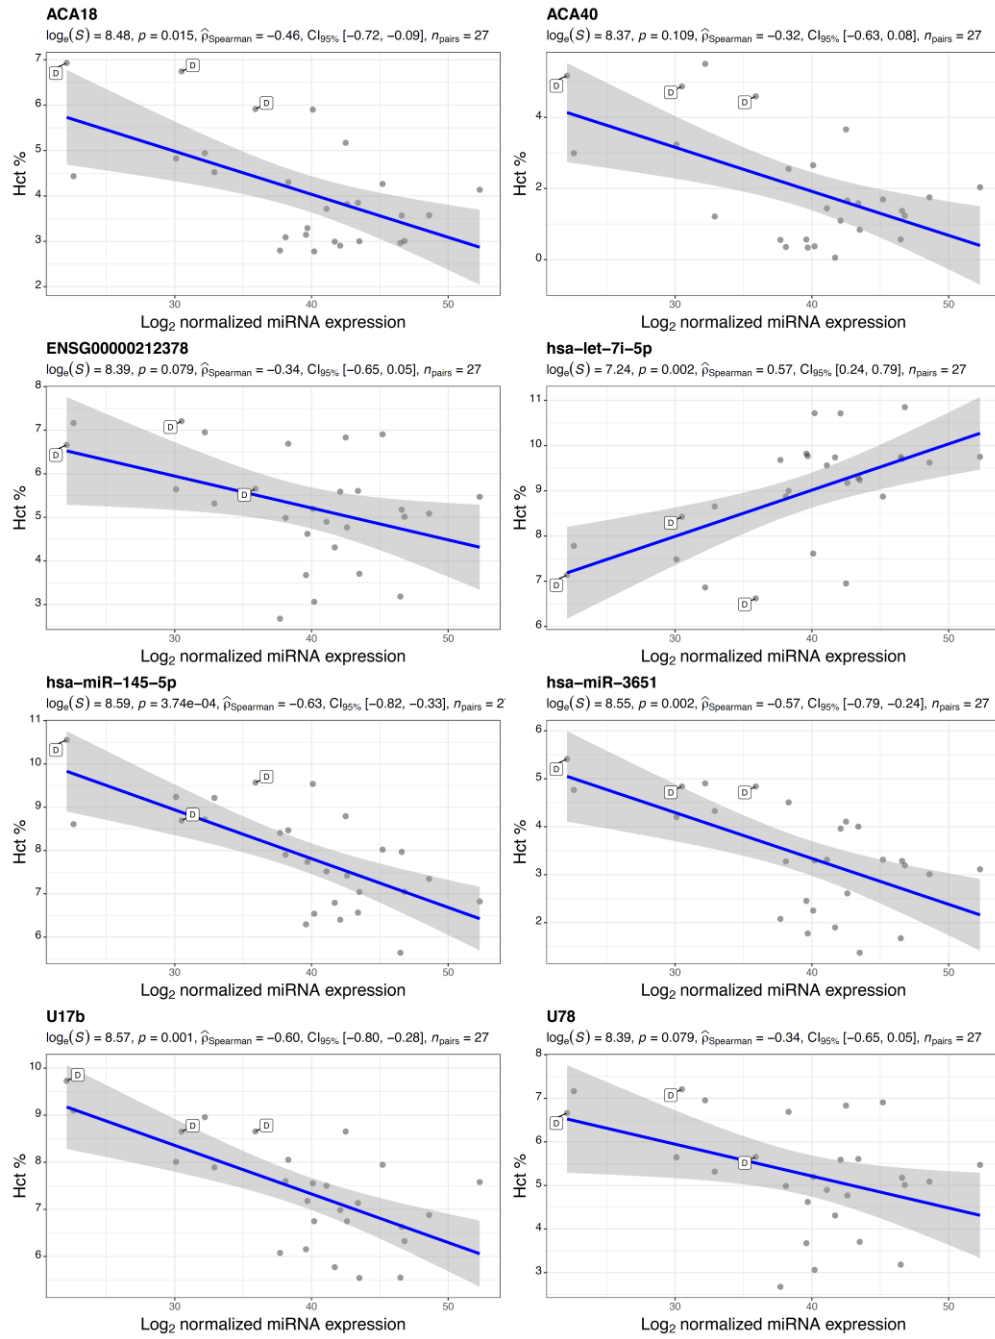

(B)

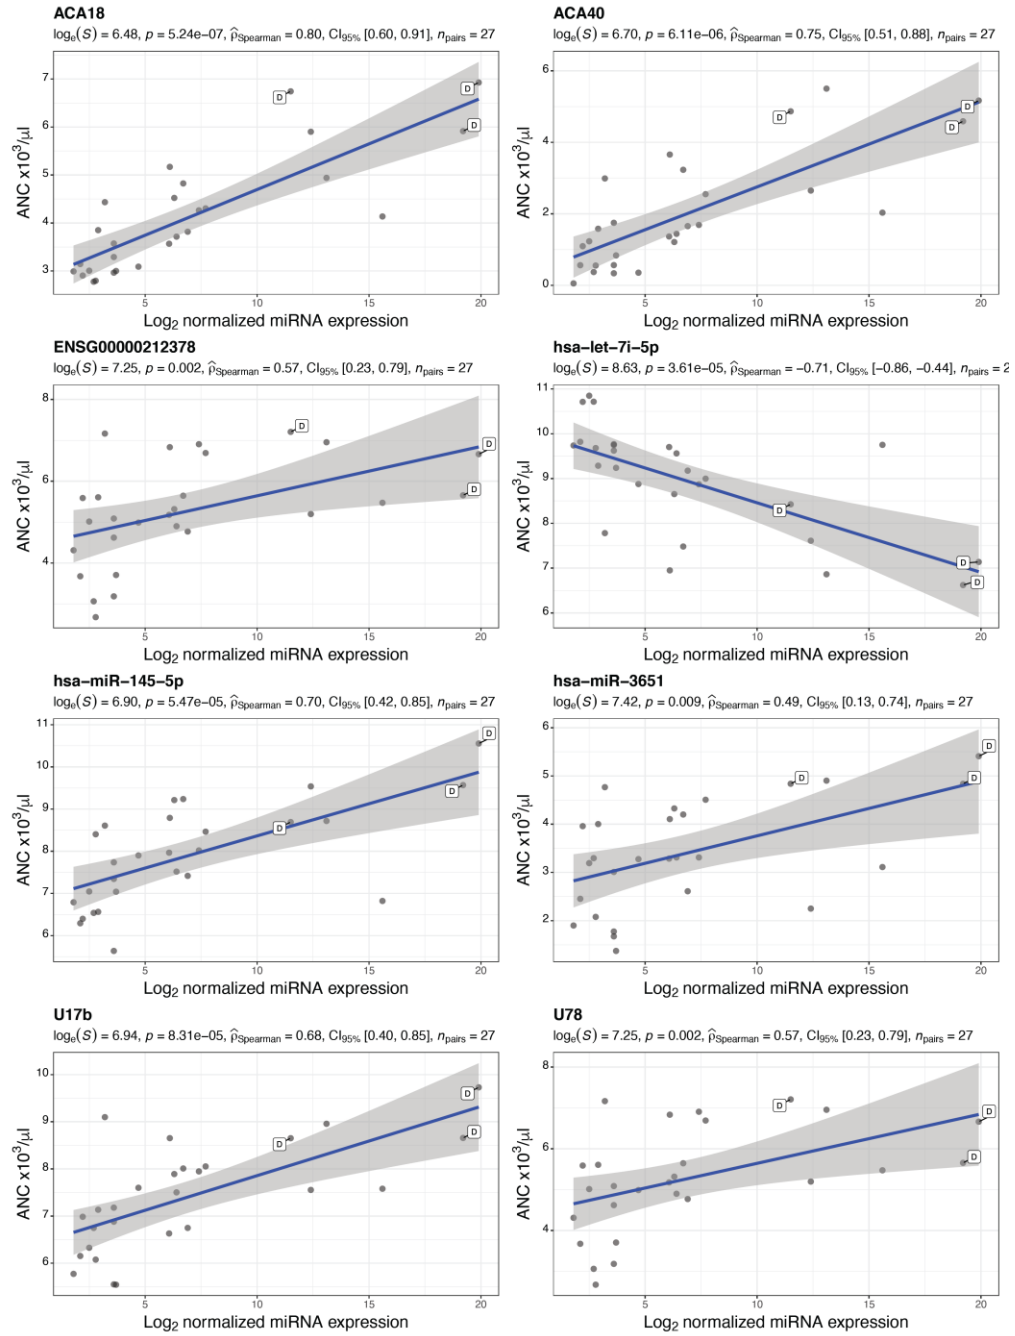

(C)

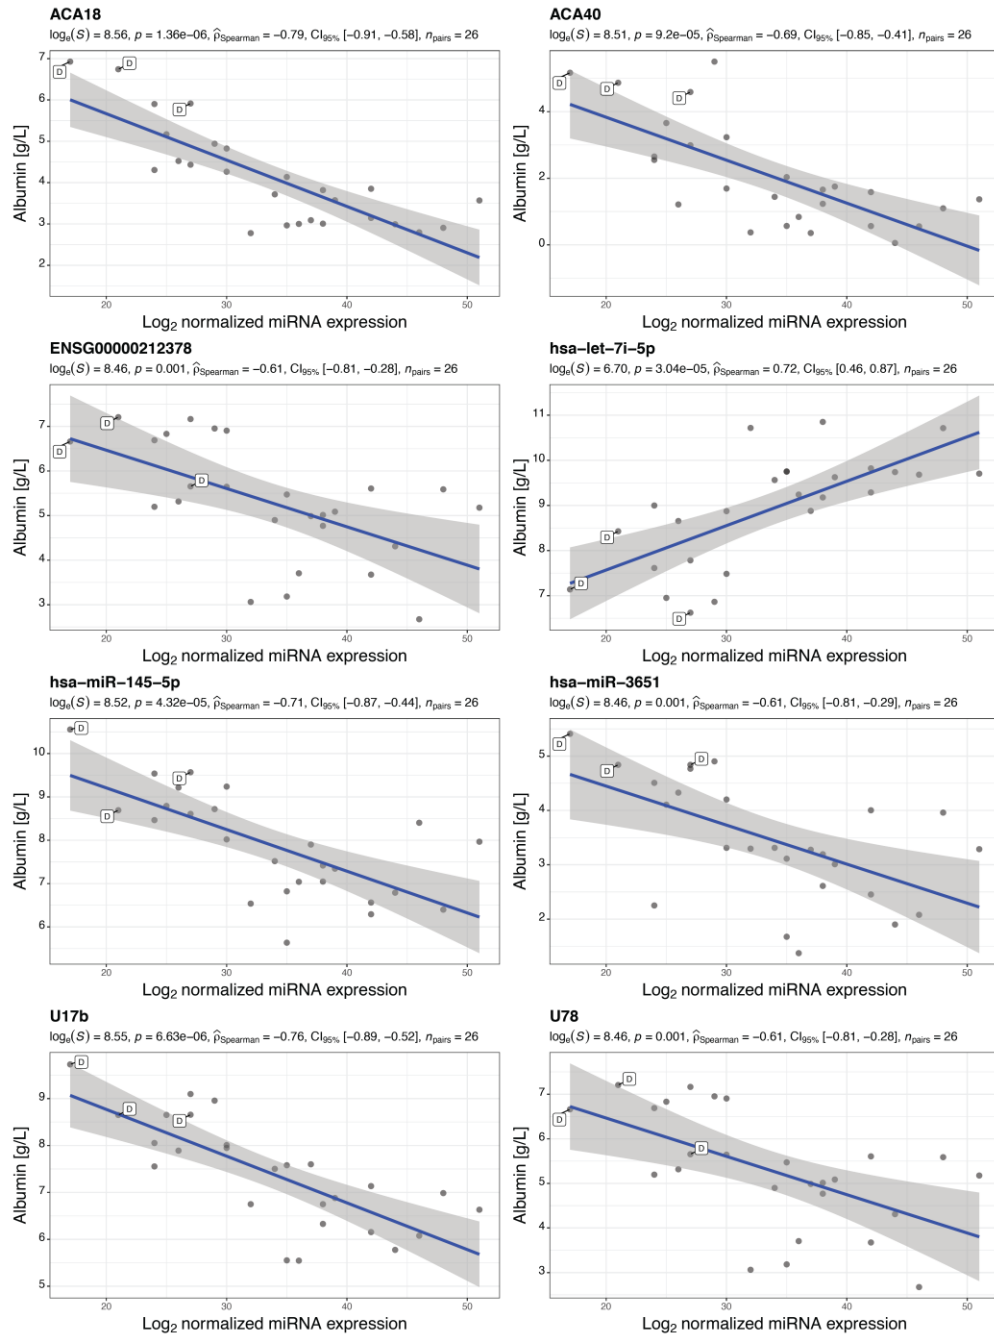

**Figure S2.** Correlation between expression levels of common differentially expressed miRNAs and snoRNAs (in both severe versus asymptomatic, and severe versus mild comparisons) with (A) hematocrit, (B) absolute neutrophil count (ANC), and (C) albumin. Scatter plots representation with x-axis as  $\text{Log}_2$  normalized transcript expression level and y-axis as the clinical variable measurements. Each dot represents a single miRNA/snoRNAs transcript. Dots that are tagged with D letter represent a deceased patient

measurement. For all statistical tests in the plots, the APA standard for statistical reporting is shown for spearman correlation test including evidence in favor of null over alternative hypothesis, natural logarithm of Bayes Factor, p-value, Spearman's rank correlation coefficient, confidence intervals, and number of observations.

**Table S1.** Differentially expressed miRNAs and snoRNAs in severe versus asymptomatic and severe versus mild COVID-19 patients. Probe ID and Name, Transcript ID and accession, Log<sub>2</sub> fold change, and FDR values are shown.

| Probe ID                                            | Probe Name | Transcript ID    | log <sub>2</sub> FC | FDR  | Accession       |
|-----------------------------------------------------|------------|------------------|---------------------|------|-----------------|
| <b>Severe versus Asymptomatic COVID-19 patients</b> |            |                  |                     |      |                 |
| MIMAT0005898_st                                     | 20506837   | hsa-miR-1246     | 2.33                | 0.03 | MIMAT0005898    |
| ACA40_x_st                                          | 20532669   | ACA40            | 2.15                | 0.03 | ACA40           |
| MIMAT0019071_st                                     | 20518933   | hsa-miR-4532     | 2.11                | 0.03 | MIMAT0019071    |
| MIMAT0000437_st                                     | 20500755   | hsa-miR-145-5p   | 1.82                | 0.01 | MIMAT0000437    |
| ACA18_x_st                                          | 20532628   | ACA18            | 1.75                | 0.02 | ACA18           |
| ACA57_st                                            | 20532694   | ACA57            | 1.70                | 0.02 | ACA57           |
| U17b_st                                             | 20538140   | U17b             | 1.66                | 0.02 | U17b            |
| ENSG00000212378_s_st                                | 20533073   | ENSG00000212378  | 1.58                | 0.04 | ENSG00000212378 |
| U78_s_st                                            | 20538252   | U78              | 1.58                | 0.04 | U78             |
| MIMAT0018071_st                                     | 20517902   | hsa-miR-3651     | 1.51                | 0.03 | MIMAT0018071    |
| MIMAT0015058_st                                     | 20515610   | hsa-miR-3180-3p  | -1.55               | 0.01 | MIMAT0015058    |
| MIMAT0000415_st                                     | 20500715   | hsa-let-7i-5p    | -1.60               | 0.02 | MIMAT0000415    |
| <b>Severe versus Mild COVID-19 patients</b>         |            |                  |                     |      |                 |
| ACA40_x_st                                          | 20532669   | ACA40            | 2.34                | 0.03 | ACA40           |
| MIMAT0017986_st                                     | 20517816   | hsa-miR-3609     | 2.26                | 0.02 | MIMAT0017986    |
| ENSG00000212378_s_st                                | 20533073   | ENSG00000212378  | 1.97                | 0.02 | ENSG00000212378 |
| U78_s_st                                            | 20538252   | U78              | 1.97                | 0.02 | U78             |
| MIMAT0000231_st                                     | 20500399   | hsa-miR-199a-5p  | 1.94                | 0.05 | MIMAT0000231    |
| MIMAT0000250_st                                     | 20500432   | hsa-miR-139-5p   | 1.93                | 0.03 | MIMAT0000250    |
| ACA18_x_st                                          | 20532628   | ACA18            | 1.87                | 0.04 | ACA18           |
| U79_st                                              | 20538254   | U79              | 1.79                | 0.04 | U79             |
| U78_x_st                                            | 20538253   | U78              | 1.74                | 0.04 | U78             |
| U17b_st                                             | 20538140   | U17b             | 1.69                | 0.01 | U17b            |
| MIMAT0000437_st                                     | 20500755   | hsa-miR-145-5p   | 1.69                | 0.04 | MIMAT0000437    |
| MIMAT0018071_st                                     | 20517902   | hsa-miR-3651     | 1.61                | 0.01 | MIMAT0018071    |
| ACA20_st                                            | 20532631   | ACA20            | 1.59                | 0.02 | ACA20           |
| MIMAT0030416_st                                     | 20529133   | hsa-miR-1273h-3p | 1.56                | 0.03 | MIMAT0030416    |
| U44_st                                              | 20538182   | U44              | 1.51                | 0.05 | U44             |
| MIMAT0022977_st                                     | 20519405   | hsa-miR-4632-5p  | -1.53               | 0.04 | MIMAT0022977    |
| MIMAT0027623_st                                     | 20525684   | hsa-miR-6861-5p  | -1.54               | 0.02 | MIMAT0027623    |

|                 |          |                 |       |      |              |
|-----------------|----------|-----------------|-------|------|--------------|
| MIMAT0027504_st | 20525565 | hsa-miR-6802-5p | -1.55 | 0.02 | MIMAT0027504 |
| MIMAT0021128_st | 20520577 | hsa-miR-5196-5p | -1.57 | 0.02 | MIMAT0021128 |
| MIMAT0004792_st | 20504273 | hsa-miR-92b-5p  | -1.58 | 0.02 | MIMAT0004792 |
| MIMAT0027510_st | 20525571 | hsa-miR-6805-5p | -1.59 | 0.04 | MIMAT0027510 |
| MIMAT0000096_st | 20500179 | hsa-miR-98-5p   | -1.67 | 0.04 | MIMAT0000096 |
| MIMAT0015065_st | 20515617 | hsa-miR-3185    | -1.72 | 0.02 | MIMAT0015065 |
| MIMAT0003237_st | 20504295 | hsa-miR-572     | -1.79 | 0.02 | MIMAT0003237 |
| MIMAT0019892_st | 20519615 | hsa-miR-371b-5p | -1.79 | 0.02 | MIMAT0019892 |
| MIMAT0018178_st | 20518425 | hsa-miR-3180    | -1.81 | 0.02 | MIMAT0018178 |
| MIMAT0031000_st | 20529783 | hsa-miR-8073    | -1.82 | 0.01 | MIMAT0031000 |
| MIMAT0019887_st | 20519609 | hsa-miR-4750-5p | -1.83 | 0.02 | MIMAT0019887 |
| MIMAT0023700_st | 20523007 | hsa-miR-6075    | -1.93 | 0.03 | MIMAT0023700 |
| MIMAT0000415_st | 20500715 | hsa-let-7i-5p   | -1.94 | 0.02 | MIMAT0000415 |
| MIMAT0005586_st | 20506779 | hsa-miR-1231    | -2.00 | 0.02 | MIMAT0005586 |
| MIMAT0004948_st | 20505790 | hsa-miR-885-3p  | -2.03 | 0.02 | MIMAT0004948 |

**Table S2.** Mature sequence of annotated differentially expressed miRNAs that are available in miRbase. microRNA names, miRBase accession IDs, and microRNA mature sequences are shown. For hsa-mir-453, reads that map to the annotated mir-4532 locus (many with one mismatch) map exactly to annotated 28S rRNA sequences. The miRNA annotation is therefore likely to be false, and the miRNA was therefore removed from the database.

| microRNA name    | miRBase accession | microRNA mature sequence  |
|------------------|-------------------|---------------------------|
| hsa-let-7i-5p    | MIMAT0000415      | UGAGGUAGUAGUUUGUGCUGUU    |
| hsa-miR-1231     | MIMAT0005586      | GUGUCUGGGCGGACAGCUGC      |
| hsa-miR-1246     | MIMAT0005898      | AAUGGAUUUUUGGAGCAGG       |
| hsa-miR-1273h-3p | MIMAT0030416      | CUGCAGACUCGACCUCCCAGGC    |
| hsa-miR-139-5p   | MIMAT0000250      | UCUACAGUGCACGUGUCUCCAGU   |
| hsa-miR-145-5p   | MIMAT0000437      | GUCCAGUUUUUCCCAGGAAUCCCU  |
| hsa-miR-199a-5p  | MIMAT0000231      | CCCAGUGUUCAGACUACCUGUUC   |
| hsa-miR-3180     | MIMAT0018178      | UGGGGCGGAGCUUCCGGAG       |
| hsa-miR-3185     | MIMAT0015065      | AGAAGAAGGCGGUCGGUCUGCGG   |
| hsa-miR-3609     | MIMAT0017986      | CAAAGUGAUGAGUAAUACUGGCUG  |
| hsa-miR-3651     | MIMAT0018071      | CAUAGCCCCGGUCGCUGGUACAUGA |
| hsa-miR-371b-5p  | MIMAT0019892      | ACUCAAAAGAUGGCGGCACUUU    |
| hsa-miR-4632-5p  | MIMAT0022977      | GAGGGCAGCGUGGGUGUGGCGGA   |
| hsa-miR-4750-5p  | MIMAT0019887      | CUCGGGCGGAGGUGGUUGAGUG    |
| hsa-miR-5196-5p  | MIMAT0021128      | AGGGAAGGGGACGAGGGUUGGG    |
| hsa-miR-572      | MIMAT0003237      | GUCCGCUCGGCGGUGGCCCA      |
| hsa-miR-6075     | MIMAT0023700      | ACGGCCCAGGCGGCAUUGGUG     |
| hsa-miR-6802-5p  | MIMAT0027504      | CUAGGUGGGGGGCUUGAAGC      |
| hsa-miR-6805-5p  | MIMAT0027510      | UAGGGGGCGGCUUGUGGAGUGU    |
| hsa-miR-6861-5p  | MIMAT0027623      | ACUGGGUAGGUGGGGCUCCAGG    |
| hsa-miR-8073     | MIMAT0031000      | ACCUGGCAGCAGGGAGCGUCGU    |
| hsa-miR-885-3p   | MIMAT0004948      | AGGCAGCGGGGUGUAGUGGAUA    |
| hsa-miR-92b-5p   | MIMAT0004792      | AGGGACGGGACGCGGUGCAGUG    |
| hsa-miR-98-5p    | MIMAT0000096      | UGAGGUAGUAAGUUGUAUUGUU    |



**Table S3.** Sequences of differentially expressed small nucleolar RNAs in severe cases of COVID-19. Transcripts include snoRNA predicted using sequences from RFAM and miRbase. The following snoRNAs transcript IDs are not annotated in miRbase database:

| Transcript ID   | Sequence                                                                                                                                                                                                                         |
|-----------------|----------------------------------------------------------------------------------------------------------------------------------------------------------------------------------------------------------------------------------|
| ACA18           | GTTGAGGTCTATCCCGATGGGGCTTTTCCTGTAGCCTGCA<br>CATCGTTGGAAACGCCTCATAGAGTAACTCTGTGGTTTTA<br>CTTTACTCACAGGACTATTGTTAGATCTGTGGGAAGGAAT<br>TACAAGACAGTT                                                                                 |
| ACA20           | CTTCCCATTATTTGCTGCTTGTAGTCTCACAGTGATACGA<br>GCAGTTATACGCATGGGATAAAATAACATTGGGCCACTG<br>TAAATTGAGATGAAGTAACCATTTTCATCTCTTCTGCAGG<br>GACTAGACATTG                                                                                  |
| ACA40           | TGCACTTATGTATGTTTTTGTAAACGTGGACAAAGACTTA<br>CAGATAGGTGCAAAAAATAAATCCTCTTTTGCAACCCAG<br>AACTCATTGTTTCAGTATGAGTTTTGATACATATAAGAAGG<br>GATATTA                                                                                      |
| ACA57           | TTGTCCTGGCCTATTTTTCTGCTCCCCTGTGCTCAGTTCTA<br>ACAGGGTAGTCTGGCAGGACACACAGCAATTCCCTCTCA<br>GTTTAGGAGGGCCGTCCTAAGAATAGGGCTGGCTCTTAA<br>AGGCACGAGAGGACAATT                                                                            |
| ENSG00000212378 | ATGTAATAATGTTTCATCAAATGTCTGACCTGAAATGAGCA<br>TGTAGACAAGTTAATTAACTGAAGAA                                                                                                                                                          |
| U17b            | TCCAACGTGGATACCCTGGGAGGTCCTCTCCCCAGGCTC<br>TGTCCAAGTGGCATAGGGGAGCTTAGGGCTCTGCCCCAT<br>GATGTACAGTCCCTTTCCACAACGTTGAAGATGAAGCTG<br>GGCCTCGTGTCTGCGCCTGCATATTCCTACAGCTTCCCAG<br>AGTCCTGTGGACAATGACTGGGGAGACAAACCATGCAGG<br>AAACATAT |
| U44             | CCTGGATGATGATAAGCAAATGCTGACTGAACATGAAGG<br>TCTTAATTAGCTCTAACTGACTAA                                                                                                                                                              |
| U78             | GTGTAATGATGTTGATCAAATGTCTGACCTGAAATGAGC<br>ATGTAGACAAAGGTAACACTGAAGAA                                                                                                                                                            |
| U79             | TACTGTTAGTGATGATTTTAAAATTAAAGCAGATGGGAAT<br>CTCTCTGAGAAAGAAAATGGAGATTAATCTTAAACTGAA<br>ACAGTA                                                                                                                                    |

**Table S4.** Gene Set Enrichment Analysis (GSEA) of differentially expressed miRNAs-targets via Enricher platform and Molecular Signatures Database (MSigDB). Each hallmark gene set is an expressed signature derived by aggregating many MSigDB gene sets to characterize reported biological states or processes.

| Hallmark gene set             | <i>p</i> -value | <i>q</i> -value |
|-------------------------------|-----------------|-----------------|
| TNF-alpha Signaling via NF-kB | 8.09E-09        | 1.66E-07        |
| UV Response Dn                | 6.79E-09        | 1.66E-07        |
| IL-2/STAT5 Signaling          | 1.44E-06        | 1.97E-05        |
| Hypoxia                       | 1.68E-05        | 1.37E-04        |
| Inflammatory Response         | 1.68E-05        | 1.37E-04        |
| Apoptosis                     | 4.89E-05        | 3.34E-04        |
| PI3K/AKT/mTOR Signaling       | 6.76E-05        | 3.96E-04        |
| G2-M Checkpoint               | 1.62E-04        | 8.28E-04        |
| Notch Signaling               | 2.92E-04        | 1.33E-03        |
| Allograft Rejection           | 1.32E-03        | 3.60E-03        |
| Estrogen Response Early       | 1.32E-03        | 3.60E-03        |
| Glycolysis                    | 1.32E-03        | 3.60E-03        |
| Interferon Gamma Response     | 1.32E-03        | 3.60E-03        |
| mTORC1 Signaling              | 1.32E-03        | 3.60E-03        |
| p53 Pathway                   | 1.32E-03        | 3.60E-03        |
| IL-6/JAK/STAT3 Signaling      | 5.31E-03        | 1.36E-02        |
| Angiogenesis                  | 9.34E-03        | 1.74E-02        |
| Apical Junction               | 8.87E-03        | 1.74E-02        |
| Hedgehog Signaling            | 9.34E-03        | 1.74E-02        |
| KRAS Signaling Dn             | 8.87E-03        | 1.74E-02        |
| Mitotic Spindle               | 8.72E-03        | 1.74E-02        |
| Myogenesis                    | 8.87E-03        | 1.74E-02        |
| Wnt-beta Catenin Signaling    | 1.26E-02        | 2.24E-02        |
| TGF-beta Signaling            | 2.02E-02        | 3.46E-02        |
| Myc Targets V2                | 2.31E-02        | 3.79E-02        |

**Table. S5. Candidate genes that connect with more than 6 miRNA-target interactions using miRTarBase.** \*CDKN1A: Cyclin Dependent Kinase Inhibitor 1A, SOCS7: Suppressor Of Cytokine Signaling 7, IGF1R: Insulin Like Growth Factor 1 Receptor, MIDN: Midnolin, LMNB2: Lamin B2.

| Gene Symbol* | <i>p</i> -value | FD R | Odd ratio | Interactions | microRNAs                                                                                                                                                    |
|--------------|-----------------|------|-----------|--------------|--------------------------------------------------------------------------------------------------------------------------------------------------------------|
| CDKN1A       | 0.00055         | 0.3  | 0.318     | 10           | hsa-miR-145-5p, hsa-miR-572, hsa-miR-98-5p, hsa-miR-371b-5p, hsa-let-7i-5p, hsa-miR-6802-5p, hsa-miR-3180, hsa-miR-4632-5p, hsa-miR-6805-5p, hsa-miR-5196-5p |
| SOCS7        | 0.00037         | 0.3  | 0.206     | 7            | hsa-miR-145-5p, hsa-let-7i-5p, hsa-miR-1273h-3p, hsa-miR-4532, hsa-miR-4632-5p, hsa-miR-92b-5p, hsa-miR-98-5p                                                |
| IGF1R        | 0.0252          | 0.3  | 0.393     | 6            | hsa-miR-145-5p, hsa-miR-139-5p, hsa-miR-3609, hsa-miR-98-5p, hsa-let-7i-5p, hsa-miR-885-3p                                                                   |
| MIDN         | 0.0148          | 0.3  | 0.349     | 6            | hsa-miR-5196-5p, hsa-miR-3609, hsa-miR-4632-5p, hsa-miR-3180, hsa-let-7i-5p, hsa-miR-98-5p                                                                   |
